# Supplementary material for: Hypnosis-Assisted Awake Craniotomy for Eloquent Brain Tumors: Advantages and Pitfalls
Source: MDPI journal article supplement (doi:10.3390/cancers16091784), 2024-05-05
Supplement: s1 [file s1]

### A faire remplir EN POST-OPERATOIRE

#### Questionnaire de satisfaction destiné aux patients bénéficiant d'une chirurgie éveillée (avec/sans hypnose)

Au moyen de ce questionnaire, nous aimerions connaître votre **niveau de satisfaction** dans les différentes phases de votre prise en charge, en pré-opératoire, pendant l'opération (per-opératoire) et en post-opératoire.

Pour chaque question, choisissez la réponse qui correspond le mieux à ce que vous ressentez à l'heure actuelle en inscrivant "X" dans la bonne case.

#### 5 niveaux de satisfaction

1 = PAS DU TOUT

2 = PEU

3 = MOYENNEMENT

4 = PLUTÔT

5 = TRES

| <b>AVANT l'intervention :</b>                                                                                        | <b>1</b> | <b>2</b> | <b>3</b> | <b>4</b> | <b>5</b> |
|----------------------------------------------------------------------------------------------------------------------|----------|----------|----------|----------|----------|
| 1.Est-ce que les explications <b>du neurochirurgien</b> concernant la chirurgie ont été claires et suffisantes ?     |          |          |          |          |          |
| 2.Est-ce que les explications de l' <b>anesthésiste</b> concernant la chirurgie ont été claires et suffisantes ?     |          |          |          |          |          |
| 3.Est-ce que les explications de la <b>neuropsychologue</b> concernant la chirurgie ont été claires et suffisantes ? |          |          |          |          |          |
| 4.Avez-vous été suffisamment préparé(e) en terme d'information sur le déroulement pratique de la chirurgie ?         |          |          |          |          |          |
| 5.Avez-vous été suffisamment informé(e) des risques / des séquelles de la chirurgie ?                                |          |          |          |          |          |

## 5 niveaux de satisfaction

1 = PAS DU TOUT

2 = PEU

3 = MOYENNEMENT

4 = PLUTÔT

5 = TRES

| <b>PENDANT l'intervention :</b>                                                                                                                | <b>1</b> | <b>2</b> | <b>3</b> | <b>4</b> | <b>5</b> |
|------------------------------------------------------------------------------------------------------------------------------------------------|----------|----------|----------|----------|----------|
| 6.Etait-ce difficile de répondre aux tests pendant la chirurgie ?                                                                              |          |          |          |          |          |
| 7.Parveniez-vous à voir distinctement les images à dénommer ?                                                                                  |          |          |          |          |          |
| 8.Que pensez-vous de la durée des tests, était-t-elle trop longue ?                                                                            |          |          |          |          |          |
| 9.Vous êtes-vous senti(e) bien entouré(e) durant l'intervention par les différents professionnels (chirurgien, anesthésiste, neuropsychologue) |          |          |          |          |          |
| 10.La position dans laquelle vous vous trouviez pendant l'intervention était-elle confortable ?                                                |          |          |          |          |          |

- 11. Avez-vous ressenti des douleurs pendant la chirurgie ?

- ☐ Pose de cathéter veineuse/artériel (11a)
- ☐ Injections of local anesthésie au niveau du crâne (11b)
- ☐ Mise en place de la têtère (11c)
- ☐ Incision (11d)
- ☐ Réalisation des trous de trépan (11e)
- ☐ Fermeture (11f)

-Autres (11g) :

- 12. Avez-vous des souvenirs de la chirurgie ? Aucun souvenir (0) ☐ Quelques souvenirs (1) ☐ Je me souviens de tout (2) ☐
    - 12a. Si oui, les souvenirs sont-ils globalement positifs ou négatifs ? (Souligner la réponse qui convient)
    - 12b. Quels souvenirs gardez-vous en quelque mots ?
  - 13. A-t-on utilisé l'hypnose pendant la chirurgie ? Oui ou NON (soulignez la bonne réponse)
  - 14. Si vous avez utilisé l'hypnose merci de répondre aux prochaines questions :
    - 14a. Quel(s) moment(s) était(ent) agréable(s) pendant la chirurgie ?
    - 14b. Vous rappelez-vous de l'histoire racontée pendant l'hypnose ? OUI ☐ NON ☐
    - 14c. Si vous vous rappelez de l'histoire, comment la décririez-vous : relaxante, amusante, agréable, absurde, angoissante (souligner une ou plusieurs réponses)
    - 14d. Si vous vous rappelez de l'histoire, est-ce que vous vous êtes senti(e) en phase/connecté(e) à cette histoire impliqué(e) prise par l'histoire ? OUI ☐ NON ☐
    - 14e. Avez-vous conservé la notion du temps pendant l'hypnose ? OUI ☐ NON ☐
    - 14f. Vous rappelez-vous de la fin de la chirurgie, après la fin des tests neuropsychologiques ? OUI ☐ NON ☐
- 
-

## 5 niveaux de satisfaction

1 = PAS DU TOUT

2 = PEU

3 = MOYENNEMENT

4 = PLUTÔT

5 = TRES

| APRES l'intervention :                                                                             | 1 | 2 | 3 | 4 | 5 |
|----------------------------------------------------------------------------------------------------|---|---|---|---|---|
| 15.Vous sentez-vous soulagé(e) ?                                                                   |   |   |   |   |   |
| 16.Vous sentez-vous choqué(e) par la chirurgie ?                                                   |   |   |   |   |   |
| 17.Pensez-vous avoir besoin d'un soutien psychologique après avoir vécu cette chirurgie éveillée ? |   |   |   |   |   |

- 18. Qu'a changé cette opération dans votre vie en quelques mots ?

---

---

- 19. Si vous deviez bénéficier d'une nouvelle chirurgie du cerveau, accepteriez-vous une seconde fois cette expérience de la chirurgie éveillée ?

OUI ☐    NON ☐    Si oui, avec ou sans hypnose ? (Souligner la réponse qui convient)
